# Supplementary material
Source: PubMed Central journal article supplement (PMC6557670)

# Supplementary Figure 1

## A

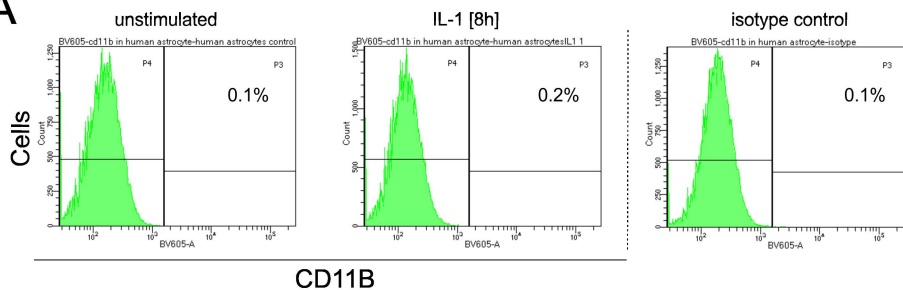

## B

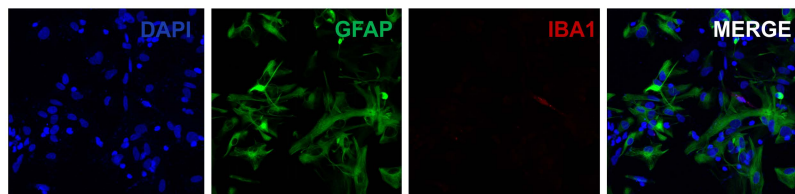

## C

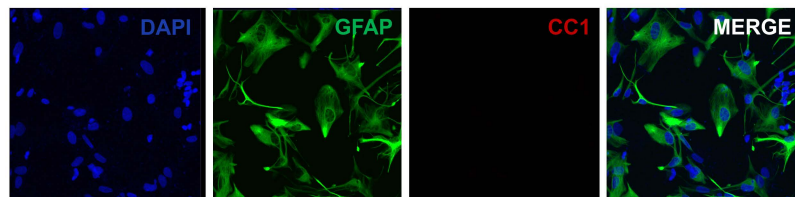

## D

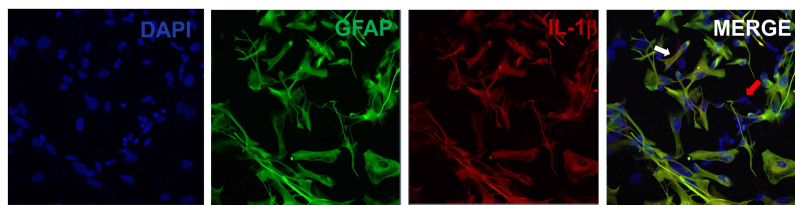

# Supplementary Figure 2

## A

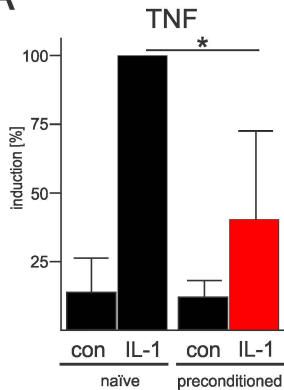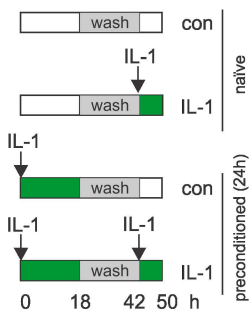

## B

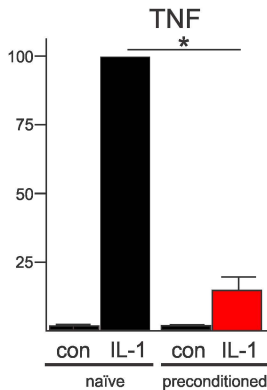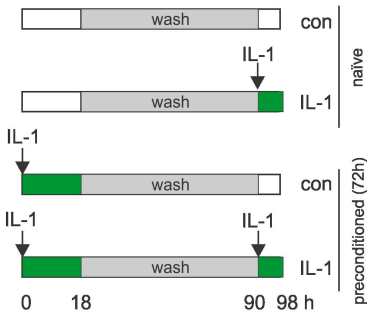

# Supplementary Figure 3

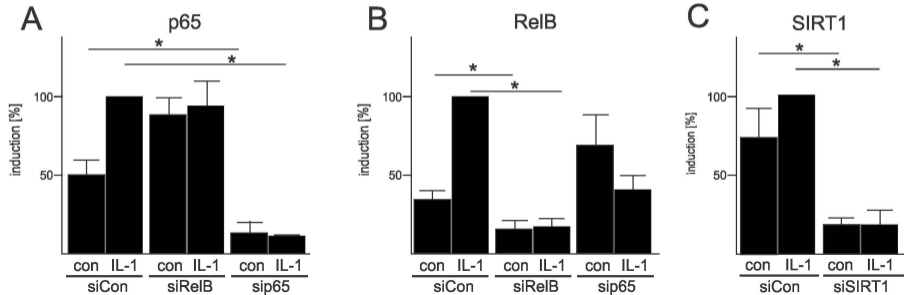

# Supplementary Figure 4

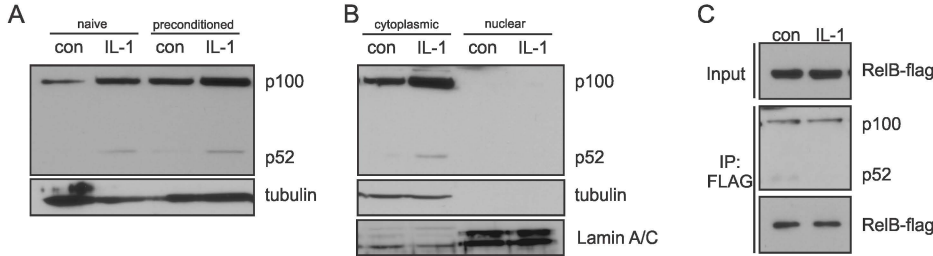

# Supplementary Figure 5

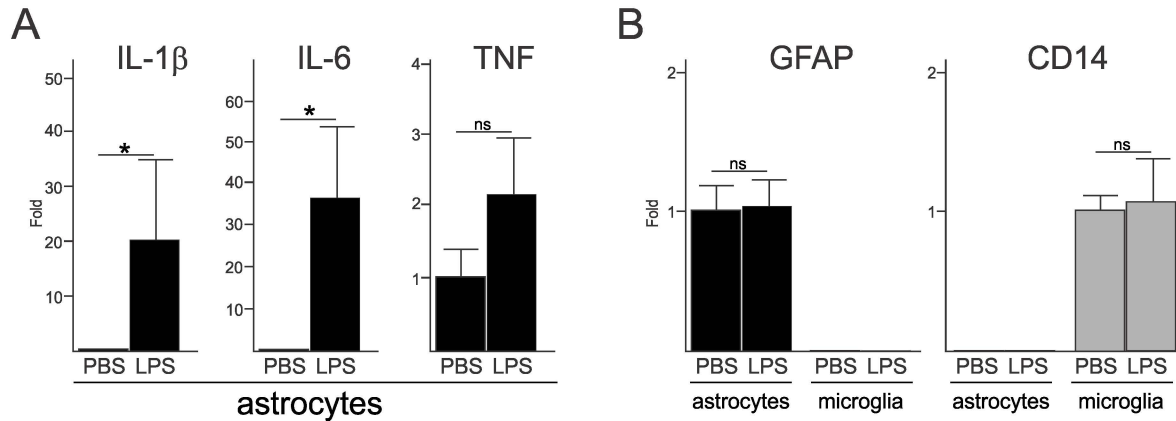

# Supplementary Figure 6

## A

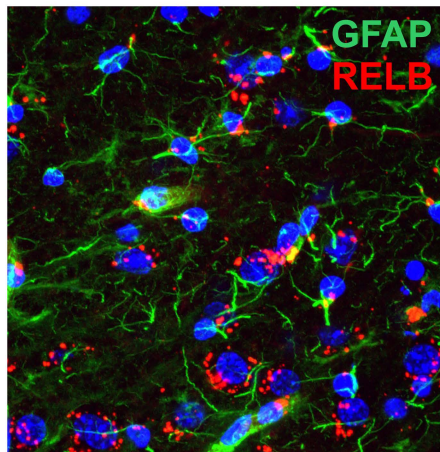

## B

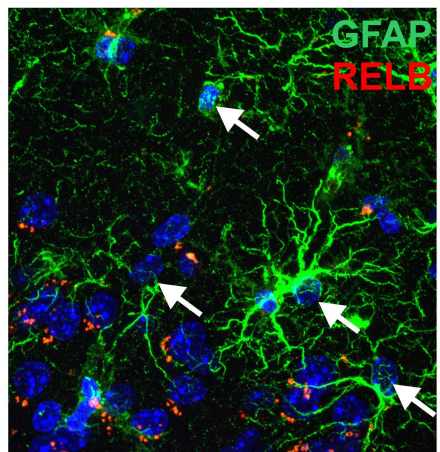

## C

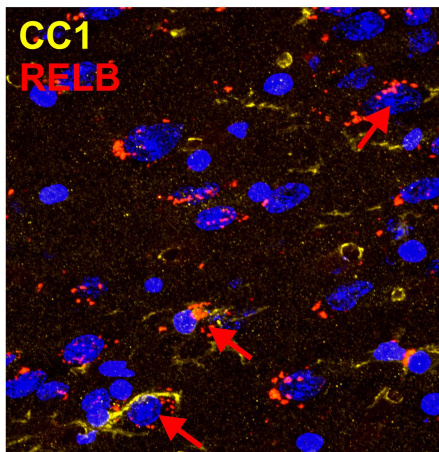

# Supplementary Figure 7

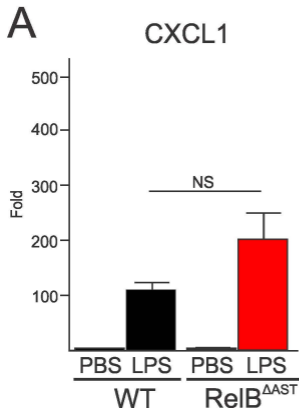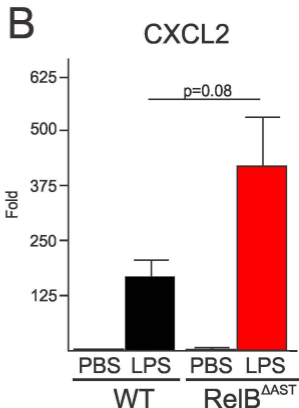

Supplement: NIHMS1021028-supplement-Supp_figS1-7.pdf [file NIHMS1021028-supplement-Supp_figS1-7.pdf]
